1 ***Epigenetic age is accelerated in schizophrenia with age- and sex-specific effects***  
2 ***and associated with polygenic disease risk***

3

4 Anil P.S. Ori<sup>1,2\*,3\*</sup>, Loes M. Olde Loohuis<sup>1</sup>, Jerry Guintivano<sup>4</sup>, Eilis Hannon<sup>5</sup>, Emma Dempster<sup>5</sup>,  
5 David St. Clair<sup>6</sup>, Nick J Bass<sup>7</sup>, Andrew McQuillin<sup>7</sup>, Jonathan Mill<sup>5</sup>, Patrick F Sullivan<sup>4,9</sup>, Rene  
6 S. Kahn<sup>10</sup>, Steve Horvath<sup>11,12</sup>, Roel A. Ophoff<sup>1,12,13</sup>

7 1. *University of California Los Angeles, Center for Neurobehavioral Genetics, Semel Institute for*  
8 *Neuroscience and Human Behavior, Los Angeles, CA, USA*

9 2. *Department of Genetics, University Medical Center Groningen, The Netherlands\**

10 3. *Department of Psychiatry, University Medical Center Groningen, The Netherlands\**

11 4. *University of North Carolina, Department of Genetics, Chapel Hill, NC, US*

12 5. *University of Exeter, University of Exeter Medical School, Exeter, UK*

13 6. *University of Aberdeen, Institute of Medical Sciences, Aberdeen, Scotland, UK*

14 7. *University College London, Division of Psychiatry, UK*

15 8. *King's College London, London, UK*

16 9. *Karolinska Institutet, Department of Medical Epidemiology and Biostatistics, Stockholm,*  
17 *Sweden*

18 10. *Icahn School of Medicine at Mount Sinai, Department of Psychiatry, New York, NY, USA*

19 11. *University of California Los Angeles, Department of Biostatistics, Fielding School of Public*  
20 *Health, Los Angeles, CA, USA.*

21 12. *University of California Los Angeles, Department of Human Genetics, David Geffen School of*  
22 *Medicine, Los Angeles, CA, USA*

23 13. *Erasmus University Medical Center, Department of Psychiatry, Rotterdam, The Netherlands.*

24 *\*Current affiliation*

25

26 Key words: schizophrenia, DNA methylation, aging, epigenetic clocks, biological aging,  
27 accelerated aging, polygenic risk, mortality risk

28

29 Correspondence: Anil Ori ([anilori.contact@gmail.com](mailto:anilori.contact@gmail.com)) and Roel Ophoff ([ophoff@ucla.edu](mailto:ophoff@ucla.edu))

30

31 Contact information RAO:

32 UCLA Center for Neurobehavioral Genetics

33 Semel Institute for Neuroscience and Human Behavior

34 Gonda Center, room 4357B

35 695 Charles E. Young Drive South

36 Los Angeles, California 90095-176

37 United States of America

38

39

40

41

42 **Abstract**

43 **Background:** The study of biological age acceleration may help identify at-risk individuals and  
44 contribute to reduce the rising global burden of age-related diseases. Using DNA methylation  
45 (DNAm) clocks, we investigated biological aging in schizophrenia (SCZ), a severe mental  
46 illness that is associated with an increased prevalence of age-related disabilities and  
47 morbidities. In a multi-cohort whole blood sample consisting of 1,090 SCZ cases and 1,206  
48 controls, we investigated differential aging using three DNAm clocks (i.e. Hannum, Horvath,  
49 Levine). These clocks are highly predictive of chronological age and are known to capture  
50 different processes of biological aging.

51

52 **Results:** We found that blood-based DNAm aging is significantly altered in SCZ with age- and  
53 sex-specific effects that differ between clocks and map to distinct chronological age windows.  
54 Most notably, differential phenotypic age (Levine clock) was most pronounced in female SCZ  
55 patients in later adulthood compared to matched controls. Female patients with high SCZ  
56 polygenic risk scores (PRS) present the highest age acceleration in this age group with +4.30  
57 years (CI: 2.40-6.20,  $P=1.3E-05$ ). Phenotypic age and SCZ PRS contribute additively to the  
58 illness and together explain up to 22.4% of the variance in disease status in this study. This  
59 suggests that combining genetic and epigenetic predictors may improve predictions of disease  
60 outcomes.

61

62 **Conclusions:** Since increased phenotypic age is associated with increased risk of all-cause  
63 mortality, our findings indicate that specific and identifiable patient groups are at increased  
64 mortality risk as measured by the Levine clock. These results provide new biological insights  
65 into the aging landscape of SCZ with age- and sex-specific effects and warrant further  
66 investigations into the potential of DNAm clocks as clinical biomarkers that may help with  
67 disease management in schizophrenia.

68

69

## 70 **Introduction**

71 As the population continues to age, reducing the burden of age-related disability and  
72 morbidity is timely and important, particularly for mental illnesses [1,2]. Ranked as one of the  
73 most disabling illnesses globally[3], schizophrenia (SCZ) has significant impact on patients,  
74 families, and society. SCZ is associated with a two- to threefold increased risk of mortality[4–  
75 6] and a 15 year reduction in life expectancy compared to the general population[7,8]. Despite  
76 elevated rates of suicide and other unnatural causes of death, most morbidity in SCZ is  
77 attributed to age-related diseases, such as cardiovascular and respiratory diseases and  
78 diabetes mellitus[5,9,10]. Processes of biological aging may therefore be accelerated in  
79 patients diagnosed with SCZ, either through an increased prevalence of age-related  
80 conditions or as a more integrated part of the illness [11]. Quantification of biological aging  
81 can help with identification of at-risk individuals or even prevention of age-related diseases  
82 [12,13]. While different aging biomarkers have been studied in SCZ, no clear demonstration  
83 of altered biological age has been shown [14]. The recent development of DNA methylation  
84 (DNAm) age predictors however offers new opportunities to study the phenomenon of aging  
85 in SCZ.

86 DNAm age predictors, or “epigenetic clocks”, are biomarkers of ageing that generate  
87 a highly accurate estimate of chronological age, known as DNAm age [15–17]. The difference  
88 ( $\Delta$ age) between predicted DNAm and chronological age is associated with a wide-range of  
89 health and disease outcomes, including all-cause mortality [18–21], socioeconomic adversity  
90 and smoking[22], metabolic outcomes, such as body mass index (BMI) and obesity [23,24],  
91 and brain-related phenotypes, such as Parkinson's disease, posttraumatic stress disorder,  
92 insomnia, major depressive disorder, and bipolar disorder [25–29]. As epigenetic signatures  
93 can be modifiable [30], DNAm-based predictors may have significant clinical utility. Studies of  
94 DNAm aging so far found limited to no evidence for altered biological age in either brain or  
95 blood in SCZ [31–34]. These studies, however, (i) consisted of small sample sizes and thus  
96 limiting the ability to detect a biological signal, (ii) used a single DNAm clock that may have  
97 not been most informative for aging studies of mental illnesses, and (iii) did not consider aging

98 differences across the lifespan of patients. As morbidities in the SCZ population differ between  
99 older and younger individuals, and females and males [5], analyses of both age- and sex-  
100 specific effects is warranted and could identify differential aging patterns, nevertheless.

101 To investigate DNAm aging in SCZ, we used three independent DNAm age estimators;  
102 the Hannum [16], Horvath [15], and Levine clock [17]. Each clock is designed using different  
103 training features and captures distinct characteristics of aging [35]; (i) the Hannum age  
104 predictor was trained on whole blood adult samples, (ii) the Horvath predictor was trained  
105 across 30 tissues and cell types across developmental stages, and (iii) the Levine combines  
106 DNAm from adult blood samples with clinical blood-based measures. As the Levine estimator  
107 is trained on chronological age and nine clinical markers, its output is referred to as DNAm  
108 PhenoAge or “phenotypic age”. The Hannum estimator is said to capture measures of cell  
109 extrinsic aging in blood, whereas the Horvath clock measures more cell intrinsic aging as it  
110 was trained across multiple tissues and therefore is less dependent on cell type composition.  
111 All three clocks, in different but complementary ways, capture the pace of biological aging that  
112 is associated with various age-related conditions and diseases, including all-cause mortality  
113 [19,35].

114 DNAm clocks were implemented across four European case-control cohorts,  
115 representing a sample of almost twice the size of the largest SCZ DNAm age study conducted  
116 so far. Analyses are performed across the full sample and stratified by age and sex. We then  
117 integrated DNAm age with age of onset, duration of illness, and SCZ polygenic risk. DNAm  
118 smoking scores and blood cell type proportions were used to gain further insights into  
119 differential aging patterns. This study overall reports an in-depth investigation of the DNAm  
120 aging landscape in schizophrenia.

121

122

123

124

125

## 126 Results

127 Figure 1 shows a schematic overview of the study design and analysis framework used  
 128 to investigate DNAm aging in SCZ. After data pre-processing and quality control, 1,090 SCZ  
 129 cases and 1,206 controls (2,296 subjects of 2,707 initial samples) were included in our  
 130 analysis. The overall sample has a mean age of 40.3 years (SD=14.4) and consists of 34.5%  
 131 women (Table S1 and Figure S1).

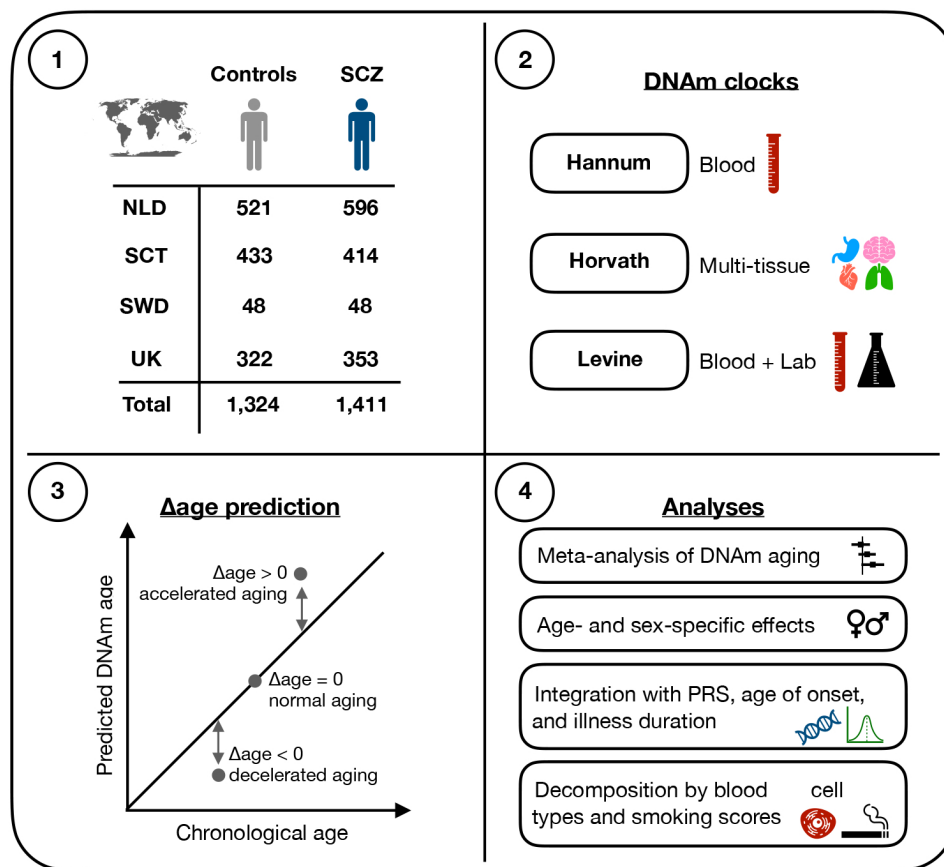

132

133 **Figure 1. Overview of study design and analysis framework.** DNA methylation (DNAm) data was  
 134 available for a total of 2,735 samples across four European cohorts. See Table S2 for more details on  
 135 samples. DNAm age estimates were generated using three DNAm clocks, each designed to capture  
 136 different features of aging (box 2). To investigate differences in aging between cases and controls,  $\Delta\text{age}$   
 137 was computed (box 3) and analyzed according to the step-wise framework shown in box 4. SCZ =  
 138 schizophrenia, NLD=Netherlands, SCT=Scotland, SWD=Sweden, UK=United Kingdom,  
 139 PRS=polygenic risk scores.

140 Across cohorts, all three clocks produce a high correlation with chronological age  
141 (Pearson's  $r = 0.92-0.94$ ; Figure 2A and S2). Using duplicates in the Dutch cohort, we  
142 assessed consistency between pairs of technical replicates, i.e. samples for which blood was  
143 collected at the same time but DNA processed at different times and DNAm data obtained on  
144 different arrays. Comparing  $\Delta$ age estimates between these pairs, we find a significant  
145 correlation for each clock (Figure S3); Hannum ( $\rho = 0.79$ ,  $n = 10$ ), Horvath ( $\rho = 0.53$ ,  
146  $n=118$ ), Levine ( $\rho = 0.67$ ,  $n=118$ ).  $\Delta$ age directionality (i.e. age deceleration or acceleration)  
147 is concordant in 90%, 73%, and 86% of pairs for Hannum, Horvath, and Levine, respectively,  
148 highlighting that the obtained estimates of DNAm age are reproducible for all three clocks.  
149 Comparing  $\Delta$ age estimates between clocks using all samples, we find a moderate  
150 concordance (Pearson's  $r = 0.39-0.43$ ; Figure S4), demonstrating that a significant proportion  
151 of the variation in  $\Delta$ age is clock-specific. As these three estimators were trained on different  
152 features of biological aging, investigating them in conjunction may thus yield broader insights  
153 into differential aging.

#### 154 **DNA methylation age is altered in an age-dependent manner**

155 Across the full sample, patients with SCZ are on average 1.53 years older in  
156 phenotypic  $\Delta$ age (Levine clock) compared to controls ( $P_{meta} = 3.45E-08$ ) (Figure 2B). The  
157 intrinsic cellular age (Horvath) predictor revealed an opposite pattern, with SCZ cases  
158 appearing 0.47 years younger compared to controls ( $P_{meta} = 0.06$ ). No differences were  
159 observed between cases and controls when applying the blood-based Hannum DNAm age  
160 predictor. Within the analysis of each clock, we observed no evidence of heterogeneity  
161 between the four cohorts ( $P_{het} > 0.05$ , Table S5).

162 Modelling the interaction effect between disease status and chronological age on  $\Delta$ age  
163 reveals a differential rate of aging between cases and controls (Figure 2C). That is, the slope  
164 of  $\Delta$ age across chronological age is 0.05- and 0.06-years steeper in cases compared to  
165 controls for the Horvath ( $P_{meta}=2.3E-03$ ) and Levine clocks ( $P_{meta}=7.1E-03$ ), respectively,

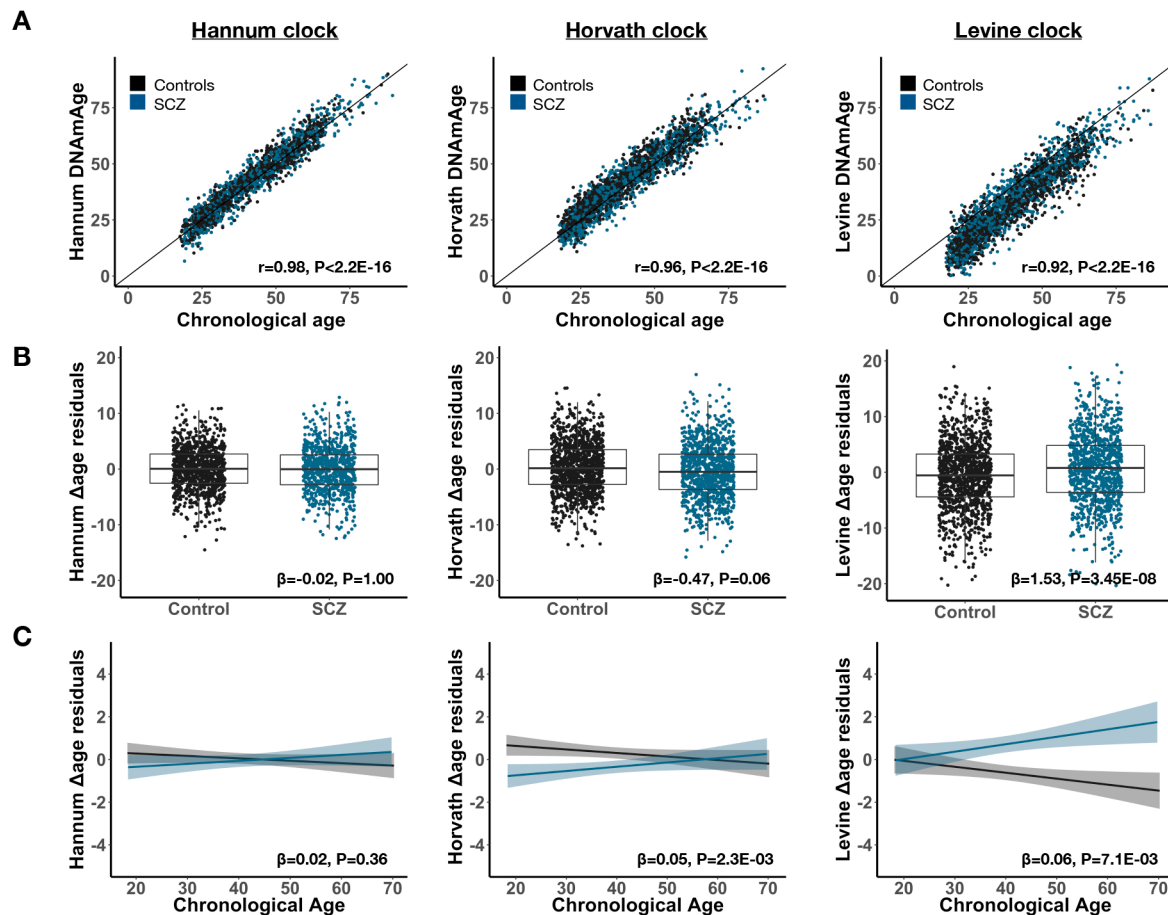

166

167 **Figure 2. DNA methylation aging is altered in schizophrenia and conditional on chronological**  
 168 **age.** Presented are results visualizing DNAm aging in SCZ for each clock; Hannum (left), Horvath  
 169 (middle), Levine (right). Cases are shown in blue and controls in black. (A) The correlation between  
 170 DNAm age and chronological age. The Pearson's correlation estimate and corresponding p-value are  
 171 shown in the bottom corner. (B) Boxplots of  $\Delta$ age between cases and controls with the meta-analytic  
 172 effect size and p-value across cohorts shown.  $\beta$  represents the mean change in  $\Delta$ age in cases  
 173 compared to controls. (C)  $\Delta$ age is visualized across chronological age with a regression line fitted  
 174 separately for cases and controls and the meta-analytic interaction effect and p-value shown.  $\beta$   
 175 represents the change in  $\Delta$ age in cases per year of chronological age compared to controls. P-values  
 176 are adjusted for multiple testing across clocks ( $n=3$ ).

177

178 with no evidence of heterogeneity between cohorts (Figure S5 and Table S6). As no significant  
 179 effects were observed for the Hannum  $\Delta$ age, we decided to focus our downstream analysis  
 180 on the phenotypic (Levine) age and intrinsic cellular (Horvath) age only. To further disentangle  
 181 the relationship between  $\Delta$ age in SCZ conditional on chronological age, we estimated  
 182 differential aging by 10-year intervals, with years 18 and 19 included in the first age group. We  
 183 observe significant DNAm age deceleration in early adulthood (18-30 years) with patients

184 estimated at -1.23 years younger ( $P_{meta}=3.9E-03$ ) in intrinsic cellular age with no significant  
 185 difference at later ages (Figure 3A). In phenotypic age, SCZ patients displayed significant  
 186 DNAm age acceleration from 30 years and older (Figure 3B), with the most pronounced age  
 187 acceleration between 50-60 years (2.29 years,  $P_{meta}=9.0E-03$ ). We again find no evidence  
 188 of heterogeneity within age groups between cohorts (Figure S6 and Table S7-8).

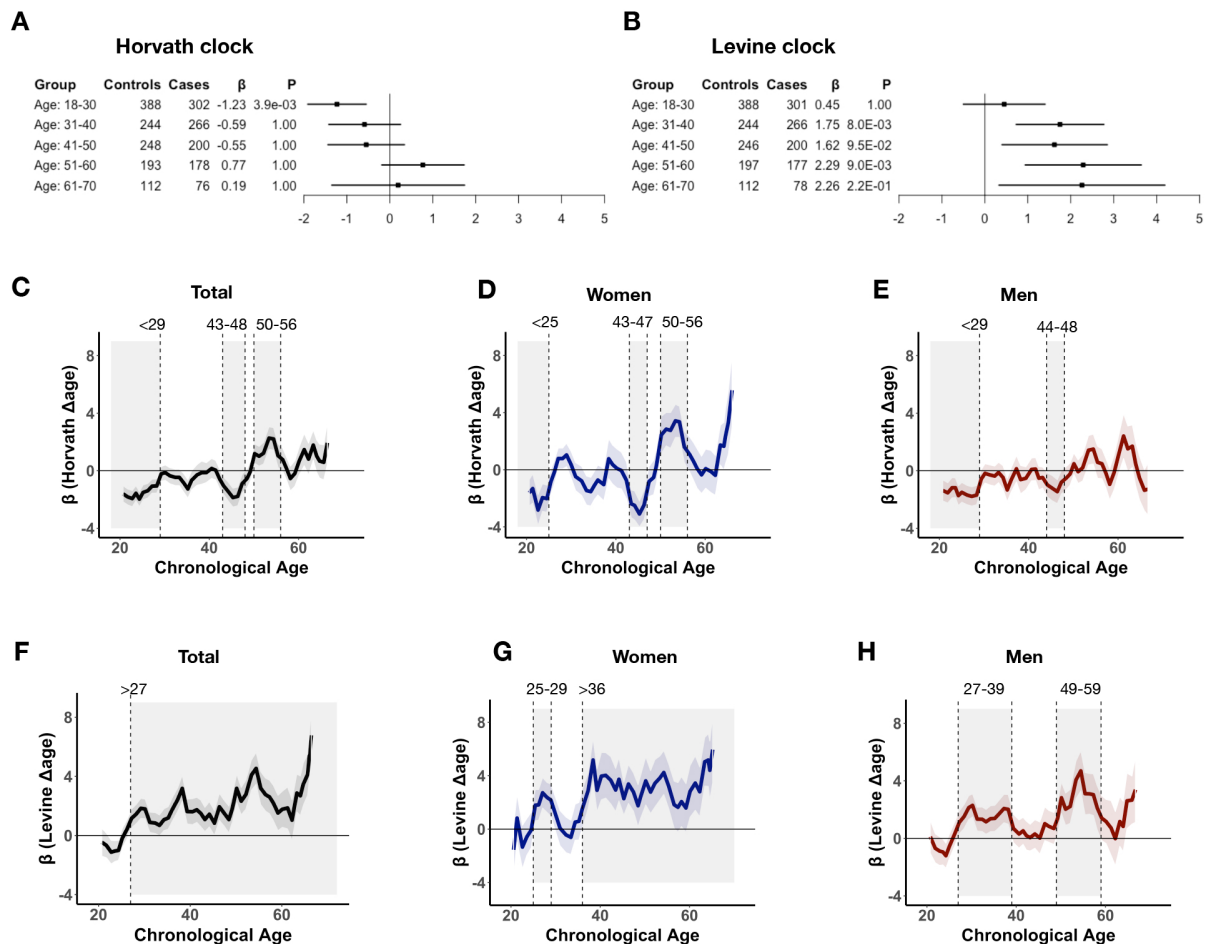

189  
 190 **Figure 3. Differential DNAm aging in schizophrenia maps to specific age windows between**  
 191 **sexes.** (A-B) Shown are  $\Delta$ age differences between cases and controls across age groups for the  
 192 Horvath (A) and Levine clock (B). For each age group, number of cases and controls, and meta-analytic  
 193 effect size ( $\beta$ ) and p-value (P) are presented. P-values are corrected for multiple testing (2 clocks x 5  
 194 groups = 10 tests). See Table S5 for more details on results and corresponding statistics. (C-H) Sliding  
 195 age- windows, using 5-year bins with steps of 1-year, were used to estimate differential aging ( $\beta$ ) at  
 196 finer resolution across the range of chronological age. Significant shifts in  $\Delta$ age between cases and  
 197 controls, defined by the standard error of  $\beta$  deviating from zero for at least 3 steps, are highlighted by  
 198 the shaded areas on the graph with the dotted vertical lines indicating the respective ages of the  
 199 intervals. Identified age intervals for the Horvath and Levine clock are shown in C-E and F-H,  
 200 respectively. Results for women (middle) and men (right) are presented in blue and red, respectively.  
 201 The effects in the total sample are displayed in black (left).



## 202 **Age- and sex-specific effects contribute to DNAm aging**

203 To quantify the overall contribution of age- and also sex-specific effects, we estimated  
 204 the gain in variance explained of  $\Delta$ age by adding the interaction terms of age and sex with  
 205 disease status to a baseline model and assessed the gain in model performance. For both  
 206 measures of aging, inclusion of interaction terms presented a significantly better fit, with the  
 207 three-way interaction model (i.e. disease status, age and sex) explaining the most variance in  
 208  $\Delta$ age (Table 1 and S9). We observe a larger gain in model fit for the three-way interaction for  
 209 phenotypic aging ( $P=0.01$ ) than for intrinsic cellular aging ( $P=0.24$ ), suggesting that sex-  
 210 specific effects are more pronounced for Levine  $\Delta$ age.

| Model variables                  | Model comparison | Horvath $\Delta$ age        |         | Levine $\Delta$ age         |         |
|----------------------------------|------------------|-----------------------------|---------|-----------------------------|---------|
|                                  |                  | $\Delta$ age R <sup>2</sup> | P-value | $\Delta$ age R <sup>2</sup> | P-value |
| Model 0: baseline                | -                | 3.6%                        | -       | 2.1%                        | -       |
| Model 1: + status                | Model 0 vs 1     | 4.0%                        | 6.6E-03 | 3.2%                        | 4.4E-06 |
| Model 2: + status*age.continuous | Model 1 vs 2     | 4.3%                        | 0.08    | 3.7%                        | 3.5E-03 |
| Model 3: + status*age.groups     | Model 1 vs 3     | 5.5%                        | 1.4E-05 | 3.9%                        | 0.02    |
| Model 4: + status*age.groups*sex | Model 3 vs 4     | 5.9%                        | 0.24    | 4.7%                        | 0.01    |

211

### 212 **Table 1. Age- and sex-specific effects significantly contribute to DNAm aging in schizophrenia.**

213 Shown are the contributions of interaction effects between disease status and age and sex on  $\Delta$ age.  
 214 The baseline model corresponds to  $\Delta$ age ~ dataset + ethnicity + platform + age.continuous + sex. For  
 215 other models, the variable(s) in addition to the baseline variables are shown with the corresponding  
 216 variance explained (R<sup>2</sup>) in  $\Delta$ age. Interaction terms with chronological age are modeled as a continuous  
 217 variable (age.continuous) or a categorical variable (age.groups). The latter uses previously defined  
 218 decades. Model comparison is performed to assess if the contribution of an interaction term is significant  
 219 compared to a model without that term. The chi-square test is used to test two models with  
 220 corresponding p-value presented. The results of these analysis are shown for both the Horvath and  
 221 Levine clock. P-values are corrected for the number of tests performed (2 clocks x 4 comparisons = 8).  
 222

## 223 **Estimating and mapping windows of differential aging in schizophrenia**

224 As our categorical age groups in the previous analyses were chosen somewhat  
 225 arbitrarily, we conducted an exploratory analysis to refine age-dependent aging effects to  
 226 identify specific age windows that are associated with differential aging. We implemented a  
 227 sliding window approach across chronological age, both in the full sample and within each sex

228 separately. Using 5-year bins and sliding steps of 1 year, we tested cases versus age-matched  
229 controls and constructed a more precise picture of differential aging across chronological age  
230 in SCZ. At this finer resolution, we mapped changes in  $\Delta$ age to specific ages with different  
231 patterns between men and women. For intrinsic cellular age, we observe a deceleration effect  
232 during early adulthood from 29 years and younger across all samples, with the shift in  
233 differential aging occurring earlier in women (<25) (Figure 3C). For both men and women, we  
234 observe age deceleration in mid-forties and for women we also find age acceleration between  
235 50-56 years (Figure 3C-E).

236 For phenotypic age, we mapped the age acceleration effect to 27 years and older  
237 across the whole sample with differences between the sexes (Figure 3F-H). In women, we  
238 find age acceleration between 25-29 years and from 36 years and older (Figure 3G). In men,  
239 we find age acceleration between 27-39 and 49-59 years (Figure 3H). More details on each  
240 age window and corresponding effect sizes are shown in Table S10. Thus far, our results  
241 show that DNAm aging, measured through the Horvath and Levine clock, is significantly  
242 different in SCZ and characterized by age-specific effects with some distinctions between the  
243 sexes, particularly for Levine  $\Delta$ age.

244

### 245 **DNAm aging affects SCZ above and beyond smoking and blood cell types**

246 To investigate the effect of smoking and blood cell type composition, we use DNAm-  
247 based smoking and cell type estimations (see Methods) as a proxy to evaluate their  
248 contribution to DNAm aging in SCZ. While DNAm clocks, by design, will encapsulate such  
249 effects, quantifying the contributions of each factor increases interpretability and helps  
250 understand the factors contributing to the differential aging findings. We observe that blood  
251 cell type proportions explain significantly more variance in DNAm aging than DNAm smoking  
252 scores (Supplementary Results S2.1). Inclusion of DNAm smoking score and blood cell  
253 proportions as covariates in our main models explains part but not all of the observed disease  
254 effects (Table S11 and Figure S8-9). Using a penalized regression framework (Table S12),

255 we show that Levine  $\Delta$ age independently contributes to the variance in disease status in  
256 women older than 36 above and beyond smoking scores and blood cell type proportions  
257 (Supplementary Results S2.2 and Figure S10). A significant proportion of the Horvath  $\Delta$ age  
258 effect on disease status is reduced by adjusting for smoking (Table S11). However, smoking  
259 is not associated with Horvath  $\Delta$ age in controls (Pearson  $r=0.01$ ,  $P=0.95$ ) nor in cases  
260 (Pearson  $r=-0.08$ ,  $P=0.28$ ) (Figure S11). As smoking covaries with SCZ disease status, it is  
261 difficult to distinguish these signals.

262

### 263 **Age deceleration by multi-tissue Horvath clock is not present in brain**

264 We investigated DNAm aging in frontal cortex postmortem brain samples of 221 SCZ  
265 cases and 278 controls. The multi-tissue Horvath clock accurately predicts DNAm age in the  
266 brain as well ( $r=0.94$ ,  $P < 2.2e-16$ ). We, however, find no difference in DNAm aging between  
267 cases and controls ( $\beta=-0.29$ ,  $P=0.46$ ) and no evidence of age-dependent aging. More details  
268 are shown in the Supplementary Results (S2.3).

269

### 270 **Phenotypic age acceleration is associated with SCZ polygenic risk in women**

271 To further decipher the factors underlying the signal of differential aging in SCZ, we  
272 examined the possible role of SCZ polygenic risk, age at onset, and illness duration (Figure  
273 S12). We first focus on the phenotypic age acceleration in female SCZ patients of age 36  
274 years and older, as these individuals showed the most consistent and pronounced aging  
275 effect. We find stronger age acceleration in cases with both low and high SCZ genetic risk  
276 (Table 2). More specifically, patients in the highest PRS1 tertile are predicted to be 4.30 years  
277 older in phenotypic age compared to controls ( $P=1.3E-05$ ), patients with median range PRS1  
278 are 1.89 years older ( $P=4.5E-02$ ), and patients in the lowest quartile are 2.89 years older  
279 ( $P=2.8E-03$ ). By permutation of PRS1 bins, we find that the effect in the highest PRS1 tertile  
280 is unlikely to occur by chance ( $P=0.024$ ). For the association between Levine  $\Delta$ age and PRS1  
281 to be most pronounced in the low and high tertile, is even less likely to happen by chance  
282 ( $P=0.006$ ). At maximum, this group of women carrying high SCZ genetic risk have on average

283 7.03 higher phenotypic  $\Delta$ age (95% CI: 3.87-10.18;  $P=1.7E-05$ ) (Figure 4A). We do not observe  
 284 such an association in women age < 36 years, men with age > 36 years, nor across the whole  
 285 dataset (Figure 4B and S13). Finally, by permuting the ranks of PRS1 within female cases >36  
 286 years, we find a mean maximum phenotypic  $\Delta$ age case-control difference of 3.69 years (95%  
 287 CI: 1.26-6.12) across 1000 permutations, further demonstrating the significance of the  
 288 observed maximum of +7.03 years phenotypic  $\Delta$ age difference. For age at onset and illness  
 289 duration, we did not find significant association with  $\Delta$ age across partitioned bins (after  
 290 permutation,  $P > 0.05$ ) (Table 2).

291

| Women: >36              | Controls | Cases | Mean value<br>in cases | $\beta$<br>(Levine $\Delta$ age) | 95% CI       | P               |
|-------------------------|----------|-------|------------------------|----------------------------------|--------------|-----------------|
| <b>Polygenic risk</b>   |          |       |                        |                                  |              |                 |
| All - no stratification | 227      | 149   | 0.35                   | 3.02                             | 1.76 – 4.27  | 3.1E-06         |
| PRS1 - continuous       | -        | 149   | 0.35                   | 0.42                             | -0.37 – 1.21 | 3E-01           |
| PRS1 - low              | 227      | 50    | -0.68                  | 2.89                             | 1.00 – 4.77  | 2.8E-03         |
| PRS1 - mid              | 227      | 50    | 0.34                   | 1.89                             | 0.05 – 3.73  | 4.5E-02         |
| PRS1 - high             | 227      | 49    | 1.40                   | 4.30                             | 2.40 – 6.20  | <b>1.3E-05*</b> |
| <b>Age of onset</b>     |          |       |                        |                                  |              |                 |
| All - no stratification | 227      | 111   | 26.50                  | 3.73                             | 2.34 – 5.12  | 2.3E-07         |
| AOO - continuous        | -        | 111   | 26.5                   | -0.08                            | -0.21 – 0.05 | 2.2E-01         |
| AOO - early             | 227      | 37    | 17.43                  | 3.26                             | 1.11 – 5.41  | 3.1E-03         |
| AOO - mid               | 227      | 37    | 25.43                  | 3.70                             | 1.58 – 5.81  | 6.7E-04         |
| AOO - late              | 227      | 37    | 36.62                  | 4.24                             | 2.09 – 6.40  | 1.3E-04         |
| <b>Illness duration</b> |          |       |                        |                                  |              |                 |
| All - no stratification | 227      | 111   | 23.37                  | 3.73                             | 2.34 – 5.12  | 2.3E-07         |
| DUR - continuous        | -        | 111   | 23.37                  | 0.03                             | -0.07 – 0.13 | 6.1E-01         |
| DUR - short             | 227      | 37    | 10.76                  | 3.90                             | 1.76 – 6.03  | 3.9E-04         |
| DUR - mid               | 227      | 37    | 23.33                  | 2.91                             | 0.78 – 5.05  | 7.7E-03         |
| DUR - long              | 227      | 37    | 36.01                  | 4.39                             | 2.25 – 6.53  | 7.3E-05         |

292

293 **Table 2. Integration of Levine  $\Delta$ age with PRS, age of onset, and illness duration in women in**  
 294 **later adulthood.** Analyses were performed using women >36 years of age. Only cases with available  
 295 information were included in the analyses. Each phenotype was analyzed as both a continuous variable  
 296 and as a categorical variable using equal tertiles from low to high bins. Mean values in cases for each

297 phenotype are presented along with the association with  $\Delta$ age ( $\beta$ ) and corresponding 95% confidence  
298 intervals and p-values. PRS1 = polygenic risk score PC1 (see Supplementary Information) scaled to  
299 mean zero with standard deviation of 1, AOO = age of onset, DUR = illness duration. Asterisk\* indicates  
300 that significance ( $P < 0.05$ ) by permutation analyses.

301

302 This is further confirmed when we integrated these two variables across PRS1 tertiles,  
303 demonstrating that the most pronounced differences in  $\Delta$ age are observed across PRS1 bins  
304 and not across the distribution of age at onset and illness duration in this subset of women  
305 (Figure S14).

306 We conducted a similar investigation on the observed intrinsic cellular age deceleration  
307 in all SCZ patients aged 29 years and younger but found no significant associations between  
308 Horvath  $\Delta$ age and PRS1, age at onset, or illness duration (Table S13 and Figure S15). While  
309 we did observe the strongest Horvath age deceleration in the high PRS1 tertile ( $\beta = -1.58$ ,  
310  $P = 3.0 \times 10^{-3}$ ), this was not significant after permutation analysis ( $P > 0.05$ ). We did not analyse  
311 other identified age windows of differential aging as these either had too few individuals with  
312 genetic or phenotypic information available or more modest disease effects limiting any further  
313 stratification.

314 Finally, we assessed how Levine  $\Delta$ age and SCZ PRS1 compare in predicting SCZ  
315 disease status in our sample. Across the whole sample, PRS1 and Levine  $\Delta$ age explain 17.0%  
316 and 2.6% of the variance in disease status, respectively. Together, they explain 19.2%. In  
317 women in later adulthood, SCZ PRS1 and Levine  $\Delta$ age explain 11.5% and 9.8%  
318 independently and 22.4% jointly (Figure 4C).

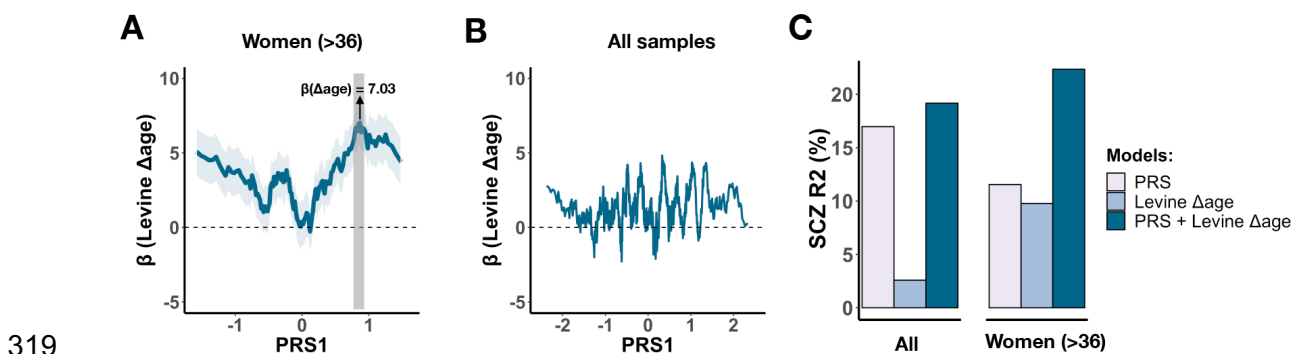

319

320 **Figure 4. DNAm aging associates with SCZ PRS and additively contributes to SCZ disease**  
321 **status.** (A) Using a sliding-window approach, Levine  $\Delta$ age difference between cases and controls are

322 shown across bins of ranked PRS1. Each bin contains 20 cases and slides from low to high PRS1 per  
323 shifts of one sample. The estimated  $\Delta$ age difference compared to all female controls >36 years is shown  
324 for each sliding bin in blue with the standard error in shaded blue. The most significant bin is highlighted  
325 by the grey vertical bar. (B) A similar analysis but then across all samples. (C) The variance explained  
326 in schizophrenia disease status (y-axis) by SCZ PRS and Levine  $\Delta$ age shown for all samples (left) and  
327 for women in later adulthood (right). The estimates shown are derived on top of the effect of sex,  
328 ethnicity, batch, platform, and chronological age.

329

330

331

332

333

334

335

336

337

338

339

340

341

342

343

344

345

346

347

348

349

350

351

## 352 Discussion

353 We performed a large study of biological aging in schizophrenia using multiple  
354 epigenetic clocks based on whole blood DNA methylation data. We observe significant  
355 patterns of sex-specific and age-dependent DNAm aging in SCZ, a finding consistent across  
356 four European cohorts. The most significant differential aging pattern that we observe is in  
357 females ages 36 years and older in which we detect advanced *phenotypic age acceleration*,  
358 as measured by the Levine clock. We also observe *intrinsic cellular age deceleration* in SCZ  
359 patients during early adulthood, as measured by the Horvath clock. Phenotypic age  
360 acceleration in female patients is associated with a higher burden of SCZ polygenic risk. This  
361 high SCZ risk group displays accelerated aging of an average of +4.30 years compared to  
362 age-matched female controls. Phenotypic age and SCZ PRS furthermore contribute additively  
363 to SCZ and explain up to 22.4% of the variance in disease status. Our findings suggest that  
364 specific and identifiable patient groups are at increased mortality risk as measured by the  
365 Levine clock and warrant further research on DNAm clocks to examine its clinical relevance.

366 The Levine estimator was constructed by predicting a surrogate measure of phenotypic  
367 age, which is a weighted average of 10 clinical markers, including chronological age, albumin,  
368 creatinine, glucose and C-reactive protein levels, alkaline phosphatase and various blood cell  
369 related measures [17]. By design, the Levine estimator is a composite biomarker that strongly  
370 predicts mortality, in particular that of age-related diseases, such as cardiovascular-related  
371 phenotypes. A 1-year increase in phenotypic age is associated with a 9% increased risk of all-  
372 cause mortality and a 10% and 20% increase of cardiovascular disease and diabetes mortality  
373 risk, respectively [17,36]. Our findings of multiple year increase in phenotypic age in SCZ could  
374 thus imply an increased mortality in patients that is linked to cardiovascular disease, a  
375 previously well-established epidemiological observation [4,5,37]. A recent study however  
376 found that DNAm age acceleration only predicts mortality in SCZ cases without pre-existing  
377 cancer using the Hannum clock [38]. They did not find such evidence using the Levine clock.  
378 The smaller sample size and predominantly male cohort may have reduced the predictive  
379 power of the study. Our findings warrant a more focused and larger study of DNAm aging in

380 female patients in later adulthood, preferably stratified by SCZ genetic risk. Our results align  
381 well with the observation that patients with SCZ, particularly women, are reported to be at high  
382 mortality risk due to cardiovascular disease and diabetes [5,39,40]. Assuming that  
383 cardiovascular risk is modifiable in SCZ [41], phenotypic age could serve as a potential  
384 biomarker to identify at-risk individuals and in this way help with disease management and  
385 improvement of life-expectancy.

386 In contrast to *age acceleration* in phenotypic age, we observe *age deceleration* in  
387 intrinsic cellular age (i.e. the Horvath DNAm age), an effect that is most pronounced in patients  
388 age 29 and younger. Unlike the association findings in females, we did not observe clear  
389 patterns with genetic and phenotypic variables that could help to further decipher the signal.  
390 Horvath  $\Delta$ age furthermore showed strong age-specific effects but less clear sex-specific  
391 effects. We did not observe *age deceleration* in postmortem brain samples of the human  
392 cortex, indicating that the observed aging signal in SCZ may be blood-specific. Horvath DNAm  
393 aging has been shown to be associated with molecular processes of development and cell  
394 differentiation [15,35], including through blood-based DNAm age measures in human  
395 (neuro)developmental phenotypes [42,43]. Our findings may indicate that patients diagnosed  
396 with SCZ in this age group show evidence of delayed or deficient development and that this  
397 is detectable in blood through the multi-tissue Horvath clock. This however remains  
398 speculative and future work is needed to further dissect how blood-based *Horvath age*  
399 *deceleration* is associated with SCZ.

400 While we did observe aging effects with the Horvath and Levine clock, we did not with  
401 the Hannum clock. The Hannum clock is less predictive of age acceleration effects on mortality  
402 risk than the Levine clock [17], which could explain the lack of findings in our analyses. The  
403 Hannum estimator furthermore cannot be used on first generation 27K DNA methylation  
404 arrays which reduced the sample size of this study with 30% and may have impacted the  
405 statistical power of these specific analyses. This highlights the benefits of designing methods  
406 that are inclusive to all platforms, so all data, both old and new, can be leveraged.



407           After publication of the preprint of our manuscript [44], Higging-Cheng et al. also  
408 reported significant DNAm alterations in SCZ [45]. This smaller study included 567 SCZ cases  
409 and 594 non-psychiatric controls with most of the sample (UK and SCT cohorts) also included  
410 in our study. Similar to our finding of 1.53 years of phenotypic age acceleration in  
411 schizophrenia cases, they report a 1.4- to 1.9-year increase in  $\Delta$ age in SCZ cases compared  
412 to controls. In addition, using GrimAge, a newly trained DNAm mortality clock [46], they  
413 observe age acceleration of 2.5- to 5.8-years. Unlike phenotypic age acceleration, this  
414 increase is largely driven by smoking effects. Similar to our work, this work highlights the value  
415 of analysing multiple clocks in conjunction and again suggesting that distinct biological  
416 processes of aging are altered in SCZ. In addition to the larger sample size, there are other  
417 key differences between our study and Higgins-Cheng et al. First, we performed detailed  
418 phenotypic analyses including explicit modelling of age and sex-specific effects. Second,  
419 methodically, we performed meta-analyses across cohorts as opposed to individual analyses  
420 per cohort. This approach, combined with multiple testing correction, is robust to cohort-  
421 specific artefacts in the data. Third, we integrated DNAm age with SCZ polygenic risk. Our  
422 PRS analyses yielded important insights into specific patient groups that could be at higher  
423 risk of all-cause mortality and that DNAm  $\Delta$ age and SCZ polygenic risk contribute additively  
424 to the illness. The latter suggests that combining genetic and epigenetic predictors can  
425 augment downstream prediction of outcomes in SCZ, similarly to what was recently shown for  
426 BMI [47].

427           A systematic review of aging biomarkers found that less than a quarter of studies  
428 explored an interaction effect or statistically compared the regression slope between groups  
429 in SCZ [14]. Our findings of sex-specific and age-dependent DNAm aging support their  
430 recommendations to specifically examine interaction effects with age and sex in aging studies  
431 but also more general in epigenetic studies of SCZ, such as epigenome-wide association  
432 studies. Future work should also be extended to integrate nonlinear models to fully capture  
433 the complex relationship between DNAm aging and clinically relevant variables across the

434 lifespan of patients. These models will help validate and further refine the most relevant age  
435 intervals.

436           A limitation of the study is the cross-sectional design of the cohorts used. While we do  
437 find an association with SCZ polygenic risk, dissecting cause-and-effect relationships remains  
438 challenging. Independent replication studies are needed, preferably using longitudinal  
439 prospective cohorts with genomic data and information on symptom recurrence and severity,  
440 comorbidities and other phenotype-related variables. These studies can assess the clinical  
441 relevance of DNAm aging in SCZ above and beyond other known health risk factors and  
442 disease biomarkers, such as medication use. An urgent open question remains whether  
443 DNAm age signatures are modifiable with regards to clinical and lifestyle factors associated  
444 with SCZ. Improvement of existing methodology and/or development of new DNAm age  
445 biomarkers [48,49] may in addition help to better study differential aging in SCZ and related  
446 disorders with increased mortality. Combining blood-based DNAm age with that of other aging  
447 profiles, such as MRI-based brain age [50], may further advance our understanding of aging  
448 and SCZ disease progression, including the increased mortality [51]. Finally, our findings  
449 support an integrative strategy with polygenic disease risk to improve clinical utilization.

450           Schizophrenia, like other mental illnesses, are associated with a wide-range of  
451 subsequent chronic physical conditions, including many age-related diseases [52]. While  
452 health and life expectancy of the general population continues to improve, the mortality  
453 disparity between patients with schizophrenia and those unaffected continues to increase  
454 [9,10,53,54]. As the burden of age-related diseases continues to rise, early detection and  
455 subsequent opportunities for interventions before disabilities and co-morbidities become  
456 established will be important [1,2]. Molecular biomarkers of aging, such as DNAm clocks, are  
457 now emerging as candidate tools for screening and intervention. Taken together, this study  
458 strengthens the need for more research on DNA methylation aging in SCZ, a population  
459 vulnerable to age-related diseases and excess mortality.

460

461

## 462 **Material and Methods**

### 463 *Cohort and sample description*

464 Details of samples included in this study can be found in the Supplementary  
465 Information. Briefly, unrelated patients with SCZ and ancestry-matched non-psychiatric  
466 controls from four cohorts of European ancestry were included; the Netherlands (N=1,116),  
467 Scotland (N=847), Sweden (N=96), and the United Kingdom (N=675). Cases were selected  
468 on the basis of a clinical diagnosis of SCZ using the Diagnostic and Statistical Manual for  
469 Mental Disorders (DSM-IV), Research Diagnostic Criteria (RDC), or the International  
470 Classification of Diseases 10 (ICD10). Controls were unaffected subjects without a history of  
471 any major psychiatric disorder. Whole blood DNAm data was available for a total of 2,707  
472 samples (1,399 cases and 1,308 controls; Table S1).

473

### 474 *Genome-wide DNA methylation profiling and data processing*

475 To quantify DNA methylation, DNA was extracted from whole blood and bisulfite  
476 converted for hybridization to the Illumina Infinium Human Methylation Beadchip. Samples  
477 were assayed with either the 27K or 450K beadchip, which contain 27,578 and 485,512 probes  
478 that interrogate CpG sites across the genome, respectively. For each platform, data  
479 processing pipelines were implemented, which includes background correction, color channel  
480 and probe type correction, and normalization of the data, to minimize the effect of technical  
481 variation on the final beta values. Samples with more than 5% of probes detected at  $P > 0.05$   
482 were excluded from further analyses ( $n=13$ ). Full details are described in the supplementary  
483 methods.

484

### 485 *DNAm-based estimation of biological age*

486 To compute blood-based DNAm age estimates, processed beta values were used as  
487 input to the Hannum[16], Horvath[15], and Levine [17] DNAm clock. These DNAm age  
488 estimators use a set of CpGs that are selected via an optimization algorithm to collectively  
489 minimize the error associated with estimating chronological age (Supplementary Information).

490 Horvath DNAm age estimates were calculated using R scripts from the Horvath DNA  
491 Methylation Calculator (<https://dnamage.genetics.ucla.edu>). Hannum and Levine estimates  
492 were obtained by using the reported set of probes with corresponding regression weights. We  
493 define  $\Delta$ age by subtracting chronological age at the time of the blood draw from the predicted  
494 DNAm age.

495

#### 496 *Statistical analyses*

497 To investigate epigenetic aging differences in SCZ, we first removed samples with  
498 discrepant phenotypic sex and predicted sex based on DNAm data (n=9), as well as samples  
499 with missing chronological age data (n=237), bipolar disorder diagnosis (n=26), and duplicate  
500 samples (n=126). For each epigenetic clock, we regressed  $\Delta$ age on technical principal  
501 components (PCs), using the first components that cumulatively explain >90% of variation in  
502 intensity values of control probes, and added the residuals to mean( $\Delta$ age) to generate a  
503 measure in the same units as  $\Delta$ age that is adjusted for technical variation ( $\Delta$ age-adjusted).  
504 We used the adjusted value for subsequent analyses and refer to it as  $\Delta$ age.

505 As association analyses of DNAm age between groups are sensitive to the distribution  
506 of chronological age, particularly at older ages, any case older than the oldest control was  
507 excluded from each cohort (n = 5 for NLD, 16 for SCT, 4 for SWD, and 1 for UK). Chronological  
508 age was furthermore included as a covariate in all analyses, as recommended[55]. To  
509 minimize the effect of outlying samples, we excluded samples >3SD from mean  $\Delta$ age across  
510 cohorts (ranging from n=13 to 16 for the three clocks). These are samples for which DNAm  
511 age diverged substantially from chronological age, which are likely artifacts.

512 For each clock and each cohort, we implemented a multivariable regression model  
513 predicting  $\Delta$ age as a function of schizophrenia status, sex, and age. For the Dutch cohort,  
514 batch and array platform were also included as covariates, as this cohort consists of multiple  
515 datasets from both the 27K and 450K platform. For each clock, regression coefficients with  
516 corresponding standard errors for each of the four cohorts were then supplied to the `rma()`  
517 function of the `metafor` package[56] in R to fit a meta-analytic fixed-effect model with inverse-

518 variance weights and obtain an overall effect size and test statistic. To quantify the significance  
519 of age- and sex-specific effects, we determined the contribution of interaction effects on top of  
520 the main disease effect. We first combined all cohorts to maintain necessary sample sizes  
521 across age and sex groups. Age groups were defined by grouping samples by decades with  
522 ages 18 and 19 included in the first decade (18-30, 31-40, etc.). To quantify the gain in  
523 variance explained in  $\Delta$ age, models with the interaction term were compared to a baseline  
524 model without the interaction term. For each analysis, statistical significance was determined  
525 using Bonferroni correction, i.e.  $P < 0.05 / \text{number of tests}$ .

526

### 527 *SCZ polygenic risk quantification*

528 Polygenic risk scores (PRS) were obtained from analyses of the SCZ GWAS  
529 conducted by Psychiatric Genomics Consortium (PGC)[57]. Using a leave one out approach,  
530 weights were generated in a training dataset based on all samples minus the target cohort in  
531 which the PRS were calculated. For each individual, weighted single nucleotide  
532 polymorphisms (SNPs) were summed to a genetic risk score that represents a quantitative  
533 and normally distributed measure of SNP-based SCZ genetic risk. To reduce between cohort-  
534 variation and maximize statistical power, we used a previously developed analytical strategy  
535 that uses principal component analysis (PCA) to concentrate disease risk across PRSs of ten  
536 GWAS p-value thresholds into the first principal component (PRS1)[58] (Supplementary  
537 Information). PRS1 explains 70.7% of the variance in risk scores and 19.9% of the variance  
538 in SCZ status, which is more than any of the original p-value thresholds (4.9-17.4%). The other  
539 PCs had no explanatory value in disease status (mean  $R^2 = 0.0\%$ ), which means that PRS1  
540 captures the majority of SNP-based SCZ polygenic risk. PRS1 was generated for 1,933  
541 individuals, 853 cases and 1080 controls, and modelled as both a quantitative and categorical  
542 variable to predict  $\Delta$ age.

543

### 544 *Defining age at onset and illness duration*

545           Age at onset is defined as the earliest reported age of psychotic symptoms or by the  
546 Operational Criteria Checklist (OPCRIT), depending on the cohort. This data is available for a  
547 subset of cases (N = 710) across the Dutch, Scottish, and UK cohorts. Illness duration is  
548 defined as the time between age at onset and blood collection. A more detailed description of  
549 each cohort's definition is available in the Supplementary Information.

550

#### 551 *DNA methylation-based smoking scores and blood cell type proportions*

552           Smoking scores and blood cell type proportions were estimated from the data (see  
553 Supplementary Methods) and used as a proxy to further decompose differential aging effects.

554

#### 555 *Estimating the contribution of differential aging in schizophrenia*

556           Using a multivariable logistic regression model for disease status, we fitted batch,  
557 cohort, DNAm smoking score, DNAm blood cell type proportions, and  $\Delta$ age as explanatory  
558 variables. We first performed a variable reduction step to select the most contributing variables  
559 to disease status by use of a regularized logistic regression using the `glmnet()` function in R  
560 ("`glmnet`" package, v2.13)[59]. Alpha was set to "1" (Lasso) and the lambda parameter  
561 estimated at the optimal value that minimizes the cross-validation prediction error rate using  
562 the `cv.glmnet()` function. For each selected variable, we then report the variance explained in  
563 SCZ status (`glm`, family = "binomial") for both the individual variable as well as adjusted for all  
564 other selected variables using the `NagelkerkeR2()` function in the "`fmsb`" package (v 0.6.3).  
565 The significance of each variable to their contribution was computed by comparing the model  
566 with and without the variable of interest using the likelihood ratio test of the `anova()` function.

567

568

569

570

571

572

573 **Declarations**

574 *Ethics approval and consent to participate*

575 All cases and controls included in this study gave informed consent. Dutch (NLD)  
576 cohorts - ethical approval was provided by local ethics committees; University College London  
577 (UK) cohort - ethical approval was provided by National Health Service multicentre and local  
578 research ethics; Aberdeen (SCT) cohort - was provided by both local and multiregional  
579 academic ethical committees. Sweden (SWD) cohort - ethical permission was provided by the  
580 Karolinska Institutet Ethical Review Committee in Stockholm, Sweden.

581

582 *Availability of data and materials*

583 The datasets used are available on the NCBI Gene Expression Omnibus (GEO) data  
584 repository or through the principal investigator of each cohort. See Table S2 and S3 for an  
585 overview and corresponding accession series numbers. See Table S4 for sample information,  
586 including individual DNAm age estimates.

587

588 *Competing interests*

589 The authors declare that they have no competing interests.

590

591 *Funding*

592 This work was supported by the US NIH under award number R01 DA028526, R01  
593 MH078075, R21 MH098035, R01 MH115676, RF1AG058484 granted to RAO. LMOL was  
594 supported by the NIH under award number K99/R00 MH116115. PFS was supported by the  
595 Swedish Research Council (Vetenskapsrådet, award D0886501), the Horizon 2020 Program  
596 of the European Union (COSYN, RIA grant agreement n° 610307), and US NIMH (U01  
597 MH109528 and R01 MH077139).

598

599 *Authors' contributions*

600 APSO and RAO conceived of the study. APSO performed data analyses and primary  
601 writing of the manuscript. LMOL, SH, and RAO advised on the work and co-wrote. RAO  
602 oversaw the work. RAO, RSK, EH, ED, DSC, NJB, AM, JM, JG and PFS provided access to  
603 data of cohorts included in the study. All authors read, gave input on, and approved the final  
604 manuscript.

605

#### 606 *Acknowledgements*

607 We thank Dr. Hannah Elliott (University of Bristol MRC Integrative Epidemiology Unit)  
608 for providing code to calculate DNA methylation smoking scores. We thank all study  
609 participants for their participation in each of the respective cohorts.

610

611

612

613

614

615

616

617

618

619

620

621

622

623

624

625

626

627



## 628 References

- 629 1. Taylor WD, Reynolds CF. Psychiatry's Obligation to Treat and Mitigate the Rising Burden  
630 of Age-Related Mental Disorders [Internet]. *JAMA Psychiatry*. 2020. p. 5. Available from:  
631 <http://dx.doi.org/10.1001/jamapsychiatry.2019.2111>
- 632 2. Moffitt TE, Caspi A. Psychiatry's Opportunity to Prevent the Rising Burden of Age-Related  
633 Disease [Internet]. *JAMA Psychiatry*. 2019. p. 461. Available from:  
634 <http://dx.doi.org/10.1001/jamapsychiatry.2019.0037>
- 635 3. Salomon JA, Haagsma JA, Davis A, de Noordhout CM, Polinder S, Havelaar AH, et al.  
636 Disability weights for the Global Burden of Disease 2013 study. *Lancet Glob Health*.  
637 2015;3:e712–23.
- 638 4. McGrath J, Saha S, Chant D, Welham J. Schizophrenia: a concise overview of incidence,  
639 prevalence, and mortality. *Epidemiol Rev*. 2008;30:67–76.
- 640 5. Olfson M, Gerhard T, Huang C, Crystal S, Stroup TS. Premature Mortality Among Adults  
641 With Schizophrenia in the United States. *JAMA Psychiatry*. 2015;72:1172–81.
- 642 6. Allebeck P. Schizophrenia: A Life-shortening Disease [Internet]. *Schizophrenia Bulletin*.  
643 1989. p. 81–9. Available from: <http://dx.doi.org/10.1093/schbul/15.1.81>
- 644 7. Hjorthøj C, Stürup AE, McGrath JJ, Nordentoft M. Years of potential life lost and life  
645 expectancy in schizophrenia: a systematic review and meta-analysis. *Lancet Psychiatry*.  
646 2017;4:295–301.
- 647 8. Laursen TM, Nordentoft M, Mortensen PB. Excess early mortality in schizophrenia. *Annu*  
648 *Rev Clin Psychol*. 2014;10:425–48.
- 649 9. Saha S, Chant D, McGrath J. A systematic review of mortality in schizophrenia: is the  
650 differential mortality gap worsening over time? *Arch Gen Psychiatry*. 2007;64:1123–31.
- 651 10. Hayes JF, Marston L, Walters K, King MB, Osborn DPJ. Mortality gap for people with  
652 bipolar disorder and schizophrenia: UK-based cohort study 2000-2014. *Br J Psychiatry*.  
653 2017;211:175–81.
- 654 11. Kirkpatrick B, Messias E, Harvey PD, Fernandez-Egea E, Bowie CR. Is schizophrenia a  
655 syndrome of accelerated aging? *Schizophr Bull*. 2008;34:1024–32.
- 656 12. Belsky DW, Caspi A, Houts R, Cohen HJ, Corcoran DL, Danese A, et al. Quantification  
657 of biological aging in young adults. *Proc Natl Acad Sci U S A*. *National Academy of*  
658 *Sciences*; 2015;112:E4104–10.
- 659 13. Field AE, Robertson NA, Wang T, Havas A, Ideker T, Adams PD. DNA Methylation  
660 Clocks in Aging: Categories, Causes, and Consequences. *Mol Cell*. 2018;71:882–95.
- 661 14. Nguyen TT, Eyster LT, Jeste DV. Systemic Biomarkers of Accelerated Aging in  
662 Schizophrenia: A Critical Review and Future Directions. *Schizophr Bull*. 2018;44:398–408.
- 663 15. Horvath S. DNA methylation age of human tissues and cell types. *Genome Biol*.  
664 2013;14:R115.
- 665 16. Hannum G, Guinney J, Zhao L, Zhang L, Hughes G, Sada S, et al. Genome-wide  
666 methylation profiles reveal quantitative views of human aging rates. *Mol Cell*. 2013;49:359–  
667 67.

- 668 17. Levine ME, Lu AT, Quach A, Chen BH, Assimes TL, Bandinelli S, et al. An epigenetic  
669 biomarker of aging for lifespan and healthspan. *Aging* . 2018;10:573–91.
- 670 18. Marioni RE, Shah S, McRae AF, Chen BH, Colicino E, Harris SE, et al. DNA methylation  
671 age of blood predicts all-cause mortality in later life. *Genome Biol.* 2015;16:25.
- 672 19. Chen BH, Marioni RE, Colicino E, Peters MJ, Ward-Caviness CK, Tsai P-C, et al. DNA  
673 methylation-based measures of biological age: meta-analysis predicting time to death. *Aging*  
674 . 2016;8:1844–65.
- 675 20. Perna L, Zhang Y, Mons U, Holleczeck B, Saum K-U, Brenner H. Epigenetic age  
676 acceleration predicts cancer, cardiovascular, and all-cause mortality in a German case  
677 cohort. *Clin Epigenetics.* 2016;8:64.
- 678 21. Levine ME, Hosgood HD, Chen B, Absher D, Assimes T, Horvath S. DNA methylation  
679 age of blood predicts future onset of lung cancer in the women’s health initiative. *Aging* .  
680 2015;7:690–700.
- 681 22. Fiorito G, Polidoro S, Dugué P-A, Kivimaki M, Ponzi E, Matullo G, et al. Social adversity  
682 and epigenetic aging: a multi-cohort study on socioeconomic differences in peripheral blood  
683 DNA methylation. *Sci Rep.* 2017;7:16266.
- 684 23. Quach A, Levine ME, Tanaka T, Lu AT, Chen BH, Ferrucci L, et al. Epigenetic clock  
685 analysis of diet, exercise, education, and lifestyle factors. *Aging* . 2017;9:419–46.
- 686 24. Horvath S, Erhart W, Brosch M, Ammerpohl O, Schönfels W von, Ahrens M, et al.  
687 Obesity accelerates epigenetic aging of human liver. *Proceedings of the National Academy*  
688 *of Sciences.* 2014;201412759.
- 689 25. Horvath S, Ritz BR. Increased epigenetic age and granulocyte counts in the blood of  
690 Parkinson’s disease patients. *Aging* . 2015;7:1130–42.
- 691 26. Boks MP, van Mierlo HC, Rutten BPF, Radstake TRDJ, De Witte L, Geuze E, et al.  
692 Longitudinal changes of telomere length and epigenetic age related to traumatic stress and  
693 post-traumatic stress disorder. *Psychoneuroendocrinology.* 2015;51:506–12.
- 694 27. Carroll JE, Irwin MR, Levine M, Seeman TE, Absher D, Assimes T, et al. Epigenetic  
695 Aging and Immune Senescence in Women With Insomnia Symptoms: Findings From the  
696 Women’s Health Initiative Study. *Biol Psychiatry.* 2017;81:136–44.
- 697 28. Han LKM, Aghajani M, Clark SL, Chan RF, Hattab MW, Shabalín AA, et al. Epigenetic  
698 Aging in Major Depressive Disorder. *Am J Psychiatry.* 2018;appiajp201817060595.
- 699 29. Fries GR, Bauer IE, Scaini G, Wu M-J, Kazimi IF, Valvassori SS, et al. Accelerated  
700 epigenetic aging and mitochondrial DNA copy number in bipolar disorder. *Transl Psychiatry.*  
701 2017;7:1283.
- 702 30. Sugden K, Hannon EJ, Arseneault L, Belsky DW, Broadbent JM, Corcoran DL, et al.  
703 Establishing a generalized polyepigenetic biomarker for tobacco smoking. *Transl Psychiatry.*  
704 2019;9:92.
- 705 31. Voisey J, Lawford BR, Morris CP, Wockner LF, Noble EP, Young RM, et al. Epigenetic  
706 analysis confirms no accelerated brain aging in schizophrenia. *NPJ Schizophr.* 2017;3:26.
- 707 32. Okazaki S, Otsuka I, Numata S, Horai T, Mouri K, Boku S, et al. Epigenetic clock  
708 analysis of blood samples from Japanese schizophrenia patients. *NPJ Schizophr.* 2019;5:4.

- 709 33. Viana J, Hannon E, Dempster E, Pidsley R, Macdonald R, Knox O, et al. Schizophrenia-  
710 associated methylomic variation: molecular signatures of disease and polygenic risk burden  
711 across multiple brain regions. *Hum Mol Genet.* 2017;26:210–25.
- 712 34. McKinney BC, Lin H, Ding Y, Lewis DA, Sweet RA. DNA methylation evidence against  
713 the accelerated aging hypothesis of schizophrenia. *NPJ Schizophr.* 2017;3:13.
- 714 35. Horvath S, Raj K. DNA methylation-based biomarkers and the epigenetic clock theory of  
715 ageing. *Nat Rev Genet.* 2018;19:371–84.
- 716 36. Liu Z, Kuo P-L, Horvath S, Crimmins E, Ferrucci L, Levine M. A new aging measure  
717 captures morbidity and mortality risk across diverse subpopulations from NHANES IV: A  
718 cohort study. *PLoS Med.* 2018;15:e1002718.
- 719 37. Allebeck P. Schizophrenia: A Life-shortening Disease [Internet]. *Schizophrenia Bulletin.*  
720 1989. p. 81–9. Available from: <http://dx.doi.org/10.1093/schbul/15.1.81>
- 721 38. Kowalec K, Hannon E, Mansell G, Burrage J, Ori APS, Ophoff RA, et al. Methylation age  
722 acceleration does not predict mortality in schizophrenia. *Transl Psychiatry.* 2019;9:157.
- 723 39. Osby U, Correia N, Brandt L, Ekblom A, Sparén P. Time trends in schizophrenia mortality  
724 in Stockholm county, Sweden: cohort study. *BMJ.* 2000;321:483–4.
- 725 40. Galletly CA, Foley DL, Waterreus A, Watts GF, Castle DJ, McGrath JJ, et al.  
726 Cardiometabolic risk factors in people with psychotic disorders: the second Australian  
727 national survey of psychosis. *Aust N Z J Psychiatry.* 2012;46:753–61.
- 728 41. Kugathasan P, Horsdal HT, Aagaard J, Jensen SE, Laursen TM, Nielsen RE.  
729 Association of Secondary Preventive Cardiovascular Treatment After Myocardial Infarction  
730 With Mortality Among Patients With Schizophrenia [Internet]. *JAMA Psychiatry.* 2018. p.  
731 1234. Available from: <http://dx.doi.org/10.1001/jamapsychiatry.2018.2742>
- 732 42. Jeffries AR, Maroofian R, Salter CG, Chioza BA, Cross HE, Patton MA, et al. Growth  
733 disrupting mutations in epigenetic regulatory molecules are associated with abnormalities of  
734 epigenetic aging. *Genome Res.* 2019;29:1057–66.
- 735 43. Hoshino A, Horvath S, Sridhar A, Chitsazan A, Reh TA. Synchrony and asynchrony  
736 between an epigenetic clock and developmental timing. *Sci Rep.* 2019;9:3770.
- 737 44. Ori APS, Olde Loohuis LM, Guintivano J, Hannon E, Dempster E, St. Clair D, et al.  
738 Schizophrenia is characterized by age- and sex-specific effects on epigenetic aging  
739 [Internet]. Available from: <http://dx.doi.org/10.1101/727859>
- 740 45. Higgins-Chen AT, Boks MP, Vinkers CH, Kahn RS, Levine ME. Schizophrenia and  
741 Epigenetic Aging Biomarkers: Increased Mortality, Reduced Cancer Risk, and Unique  
742 Clozapine Effects. *Biol Psychiatry.* 2020;88:224–35.
- 743 46. Lu AT, Quach A, Wilson JG, Reiner AP, Aviv A, Raj K, et al. DNA methylation GrimAge  
744 strongly predicts lifespan and healthspan. *Aging .* 2019;11:303–27.
- 745 47. McCartney DL, Hillary RF, Stevenson AJ, Ritchie SJ, Walker RM, Zhang Q, et al.  
746 Epigenetic prediction of complex traits and death. *Genome Biol.* 2018;19:136.
- 747 48. Zhang Q, Vallerga CL, Walker RM, Lin T, Henders AK, Montgomery GW, et al. Improved  
748 precision of epigenetic clock estimates across tissues and its implication for biological  
749 ageing. *Genome Med.* 2019;11:54.

- 750 49. Bell CG, Lowe R, Adams PD, Baccarelli AA, Beck S, Bell JT, et al. DNA methylation  
751 aging clocks: challenges and recommendations. *Genome Biol.* 2019;20:249.
- 752 50. Schnack HG, van Haren NEM, Nieuwenhuis M, Hulshoff Pol HE, Cahn W, Kahn RS.  
753 Accelerated Brain Aging in Schizophrenia: A Longitudinal Pattern Recognition Study. *Am J*  
754 *Psychiatry.* 2016;173:607–16.
- 755 51. Cole JH, Marioni RE, Harris SE, Deary IJ. Brain age and other bodily “ages”: implications  
756 for neuropsychiatry. *Mol Psychiatry* [Internet]. 2018; Available from:  
757 <http://dx.doi.org/10.1038/s41380-018-0098-1>
- 758 52. Scott KM, Lim C, Al-Hamzawi A, Alonso J, Bruffaerts R, Caldas-de-Almeida JM, et al.  
759 Association of Mental Disorders With Subsequent Chronic Physical Conditions: World  
760 Mental Health Surveys From 17 Countries. *JAMA Psychiatry.* 2016;73:150–8.
- 761 53. Osby U, Correia N, Brandt L, Ekblom A, Sparén P. Time trends in schizophrenia mortality  
762 in Stockholm county, Sweden: cohort study. *BMJ.* 2000;321:483–4.
- 763 54. Lawrence D, Hancock KJ, Kisely S. The gap in life expectancy from preventable physical  
764 illness in psychiatric patients in Western Australia: retrospective analysis of population based  
765 registers. *BMJ.* 2013;346:f2539.
- 766 55. Khoury LE, El Khoury L, Gorrie-Stone T, Smart M, Hughes A, Bao Y, et al. Properties of  
767 the epigenetic clock and age acceleration [Internet]. Available from:  
768 <http://dx.doi.org/10.1101/363143>
- 769 56. Viechtbauer W. Conducting Meta-Analyses in R with the metafor Package. *J Stat Softw*  
770 [Internet]. 2010;36. Available from: <http://dx.doi.org/10.18637/jss.v036.i03>
- 771 57. Schizophrenia Working Group of the Psychiatric Genomics Consortium. Biological  
772 insights from 108 schizophrenia-associated genetic loci. *Nature.* 2014;511:421–7.
- 773 58. Bergen SE, Ploner A, Howrigan D, CNV Analysis Group and the Schizophrenia Working  
774 Group of the Psychiatric Genomics Consortium, O’Donovan MC, Smoller JW, et al. Joint  
775 Contributions of Rare Copy Number Variants and Common SNPs to Risk for Schizophrenia.  
776 *Am J Psychiatry.* 2019;176:29–35.
- 777 59. Friedman J, Hastie T, Tibshirani R. Regularization Paths for Generalized Linear Models  
778 via Coordinate Descent. *J Stat Softw.* 2010;33:1–22.
- 779
- 780
- 781
- 782
- 783
- 784
- 785
- 786
- 787
